# Supplementary material for: Rediscovery and neotype designation of Dichaetura surreyi Martin, 1990 (Gastrotricha: Paucitubulatina) from Northern Germany with a threefold morphological examination with a specimen-saving method
Source: Research Square preprint supplement (doi:10.21203/rs.3.rs-7189628/v1), 2025-08-08
Supplement: Supplementary file 1 [file 4cb7244c6b1b162e843a473b.xlsx]

## Sheet: Página1
Family	Species_ID	COI
Chaetonotidae	Arenotus strixinoi MT57	JQ798677
Chaetonotidae	Aspidiophorus ophiodermus TK112	JN185544
Chaetonotidae	Aspidiophorus paramediterraneus MT60	JQ798678
Chaetonotidae	Aspidiophorus polystictos TK75	JQ798726
Chaetonotidae	Aspidiophorus polystictos TK76	JQ798727
Chaetonotidae	Aspidiophorus sp GA105	MN493702
Chaetonotidae	Aspidiophorus sp GA67	MN493689
Chaetonotidae	Aspidiophorus sp TR81	MN493688
Chaetonotidae	Aspidiophorus sp TR823	MN493716
Chaetonotidae	Aspidiophorus tentaculatus TK120	JQ798690
Chaetonotidae	Aspidiophorus tentaculatus TK228	JQ798721
Chaetonotidae	Aspidiophorus tetrachaetus TK99	JN185576
Chaetonotidae	Bifidochaetus veronicae HA2857	MN493714
Chaetonotidae	Chaetonotus acanthodes TK102	JQ798682
Chaetonotidae	Chaetonotus acanthodes TK211	JQ798716
Chaetonotidae	Chaetonotus acanthodes TR827	MN493713
Chaetonotidae	Chaetonotus aemilianus TK132	JQ798693
Chaetonotidae	Chaetonotus aff bombardus GA21	MN493669
Chaetonotidae	Chaetonotus aff bombardus HA2228	MN493667
Chaetonotidae	Chaetonotus aff bombardus HA236	MN493665
Chaetonotidae	Chaetonotus aff bombardus HA3044	MN493666
Chaetonotidae	Chaetonotus aff daphnes TR828	MN493701
Chaetonotidae	Chaetonotus aff daphnes TR829	MN493700
Chaetonotidae	Chaetonotus aff daphnes TR856	MN493717
Chaetonotidae	Chaetonotus aff euhystrix TR31	MN493664
Chaetonotidae	Chaetonotus aff euhystrix TR837	MN493715
Chaetonotidae	Chaetonotus aff gelidus GA1910	MN493680
Chaetonotidae	Chaetonotus aff gelidus HA101	MN493673
Chaetonotidae	Chaetonotus aff gelidus HA2229	MN493676
Chaetonotidae	Chaetonotus aff gelidus TR918	MN493683
Chaetonotidae	Chaetonotus aff heideri GA1018	MN493706
Chaetonotidae	Chaetonotus aff heideri GA1921	MN493707
Chaetonotidae	Chaetonotus aff heideri GA61	MN493704
Chaetonotidae	Chaetonotus aff heideri HA24148	MN493705
Chaetonotidae	Chaetonotus aff maximus HA2261	MN493694
Chaetonotidae	Chaetonotus aff maximus HA285	MN493703
Chaetonotidae	Chaetonotus aff microchaetus HA237	MN493699
Chaetonotidae	Chaetonotus aff oculifer TR85	MN493685
Chaetonotidae	Chaetonotus aff persimilis GA1913	MN493654
Chaetonotidae	Chaetonotus aff persimilis HA1334	MN493658
Chaetonotidae	Chaetonotus aff persimilis HA305	MN493659
Chaetonotidae	Chaetonotus aff persimilis HA76	MN493652
Chaetonotidae	Chaetonotus aff persimilis TR41	MN493653
Chaetonotidae	Chaetonotus aff sphagnophilus GA198	MN493678
Chaetonotidae	Chaetonotus aff sphagnophilus TR854	MN493679
Chaetonotidae	Chaetonotus aff subtilis HA301	MN493711
Chaetonotidae	Chaetonotus aff subtilis TR813	MN493712
Chaetonotidae	Chaetonotus aff subtilis TR82	MN493690
Chaetonotidae	Chaetonotus aff subtilis TR845	MN493693
Chaetonotidae	Chaetonotus aff subtilis TR846	MN493691
Chaetonotidae	Chaetonotus antrumus NHCGCCA12120	KU705231
Chaetonotidae	Chaetonotus arcanus STV67	OM424078
Chaetonotidae	Chaetonotus avarus VP32	OM424068
Chaetonotidae	Chaetonotus bombardus AMU21762A	MN493668
Chaetonotidae	Chaetonotus borealis AMU23746	MF374694
Chaetonotidae	Chaetonotus borealis HA322	MN493657
Chaetonotidae	Chaetonotus cf dispar TK146	JQ798696
Chaetonotidae	Chaetonotus cf gelidus GA212	MN493675
Chaetonotidae	Chaetonotus cf hornsundi HA2418	MN493661
Chaetonotidae	Chaetonotus cf hystrix TK90	JQ798732
Chaetonotidae	Chaetonotus cf laroides TK86	JQ798731
Chaetonotidae	Chaetonotus cf maximus TK186	JQ798706
Chaetonotidae	Chaetonotus cf novenarius TK151	JQ798699
Chaetonotidae	Chaetonotus cf oculifer TK188	JQ798708
Chaetonotidae	Chaetonotus cf similis TK106	JQ798686
Chaetonotidae	Chaetonotus cf similis TK230	JQ798722
Chaetonotidae	Chaetonotus cf sphagnophilus TK91	JQ798733
Chaetonotidae	Chaetonotus daphnes TK103	JQ798683
Chaetonotidae	Chaetonotus daphnes TK109	JQ798687
Chaetonotidae	Chaetonotus gelidus AMU23410	MF374695
Chaetonotidae	Chaetonotus gelidus HA2417	MN493674
Chaetonotidae	Chaetonotus gulosus VP18	OM424076
Chaetonotidae	Chaetonotus gulosus VP31	OM424077
Chaetonotidae	Chaetonotus heideri TK105	JQ798685
Chaetonotidae	Chaetonotus heideri TK221	JQ798720
Chaetonotidae	Chaetonotus heterocanthus TK100	JQ798681
Chaetonotidae	Chaetonotus hornsundi AMU2404	MF374696
Chaetonotidae	Chaetonotus hornsundi HA24176	MN493662
Chaetonotidae	Chaetonotus iratus STV65	OM424075
Chaetonotidae	Chaetonotus jaceki AMU21763	MF417816
Chaetonotidae	Chaetonotus jaceki HA24190	MN493670
Chaetonotidae	Chaetonotus luxus VP28	OM424074
Chaetonotidae	Chaetonotus luxus ZPvs20	OM424069
Chaetonotidae	Chaetonotus luxus ZPvs22	OM424070
Chaetonotidae	Chaetonotus luxus ZPvs23	OM424071
Chaetonotidae	Chaetonotus luxus ZPvs24	OM424072
Chaetonotidae	Chaetonotus luxus ZPvs25	OM424073
Chaetonotidae	Chaetonotus microchaetus TK104	JQ798684
Chaetonotidae	Chaetonotus microchaetus TK197	JQ798713
Chaetonotidae	Chaetonotus microchaetus TK201	JQ798714
Chaetonotidae	Chaetonotus microchaetus TK93	JQ798734
Chaetonotidae	Chaetonotus mirabilis BZs02	OM424059
Chaetonotidae	Chaetonotus mirabilis BZs15	OM424060
Chaetonotidae	Chaetonotus mirabilis BZs16	OM424061
Chaetonotidae	Chaetonotus mirabilis BZs17	OM424062
Chaetonotidae	Chaetonotus neptuni MT61	JQ798679
Chaetonotidae	Chaetonotus neptuni TK73	JQ798724
Chaetonotidae	Chaetonotus optabilis DB34	OM424065
Chaetonotidae	Chaetonotus optabilis DB35	OM424066
Chaetonotidae	Chaetonotus optabilis DB36	OM424067
Chaetonotidae	Chaetonotus persimilis AMU24138	MF374698
Chaetonotidae	Chaetonotus persimilis GA136	MN493660
Chaetonotidae	Chaetonotus persimilis GA153	MN493663
Chaetonotidae	Chaetonotus persimilis GA159	MN493655
Chaetonotidae	Chaetonotus persimilis GA174	MN493656
Chaetonotidae	Chaetonotus polyspinosus TK148	JQ798698
Chaetonotidae	Chaetonotus polyspinosus TK215	JQ798717
Chaetonotidae	Chaetonotus schultzei TK74	JQ798725
Chaetonotidae	Chaetonotus semovitus PWS413	MH211120
Chaetonotidae	Chaetonotus semovitus PWS422	MH211121
Chaetonotidae	Chaetonotus semovitus PWS45	MH211119
Chaetonotidae	Chaetonotus similis TK193	JQ798710
Chaetonotidae	Chaetonotus slavicus DB40	OM424079
Chaetonotidae	Chaetonotus slavicus DB41	OM424080
Chaetonotidae	Chaetonotus slavicus DB42	OM424081
Chaetonotidae	Chaetonotus slavicus DB43	OM424082
Chaetonotidae	Chaetonotus sp IC0201	MK310373
Chaetonotidae	Chaetonotus sp IC0241	MK310377
Chaetonotidae	Chaetonotus sp IC0547	MK310389
Chaetonotidae	Chaetonotus sp IC2015	MK310372
Chaetonotidae	Chaetonotus sp IC2328	MK310375
Chaetonotidae	Chaetonotus sp IC2342	MK310376
Chaetonotidae	Chaetonotus sp IC3322	MK310364
Chaetonotidae	Chaetonotus sp IC3328	MK310368
Chaetonotidae	Chaetonotus sp IC3342	MK310365
Chaetonotidae	Chaetonotus sp IC3350	MK310366
Chaetonotidae	Chaetonotus sp IC3361	MK310374
Chaetonotidae	Chaetonotus sp IC4324	MK310384
Chaetonotidae	Chaetonotus sp IC4333	MK310380
Chaetonotidae	Chaetonotus sp IC4413	MK310385
Chaetonotidae	Chaetonotus sp IC4416	MK310382
Chaetonotidae	Chaetonotus sp IC5619	MK310370
Chaetonotidae	Chaetonotus sp TK216	JQ798718
Chaetonotidae	Chaetonotus sp TK85	JQ798730
Chaetonotidae	Chaetonotus sp TR51	MN493681
Chaetonotidae	Chaetonotus sp TR815	MN493672
Chaetonotidae	Chaetonotus sp TR847	MN493692
Chaetonotidae	Chaetonotus subtilis HA165	MN493710
Chaetonotidae	Chaetonotus superbus KCH61	OM424064
Chaetonotidae	Chaetonotus superbus ZPvs55	OM424063
Chaetonotidae	Dendroichthydium ibyrapora PIC1087	PP697535
Chaetonotidae	Dendroichthydium ibyrapora PIC1088	PP697536
Chaetonotidae	Dendroichthydium ibyrapora PIC1089	PP697537
Chaetonotidae	Dendroichthydium ibyrapora PIC1090	PP697538
Chaetonotidae	Halichaetoderma aureum ZPvs21	OQ354337
Chaetonotidae	Halichaetoderma fluviatile STV66	OQ354334
Chaetonotidae	Halichaetoderma fluviatile STV68	OQ354335
Chaetonotidae	Halichaetoderma hexagonale VP27	OQ354338
Chaetonotidae	Halichaetoderma rivale VP30	OQ354336
Chaetonotidae	Halichaetonotus aculifer TK110	JQ798688
Chaetonotidae	Halichaetonotus paradoxus TK79	JQ798728
Chaetonotidae	Halichaetonotus sp TK140	JQ798695
Chaetonotidae	Halichaetonotus sp TK80	JQ798729
Chaetonotidae	Heterolepidoderma acidophilum TK111	JN185543
Chaetonotidae	Heterolepidoderma acidophilum TK169	JN185556
Chaetonotidae	Heterolepidoderma acidophilum TK172	JN185559
Chaetonotidae	Heterolepidoderma acidophilum TK53	JN185572
Chaetonotidae	Heterolepidoderma aff ocellatum TR838	MN493682
Chaetonotidae	Heterolepidoderma aff ocellatum TR912	MN493686
Chaetonotidae	Heterolepidoderma kolickae DB11	OQ354328
Chaetonotidae	Heterolepidoderma kolickae DB13	OQ354329
Chaetonotidae	Heterolepidoderma kolickae DB14	OQ354330
Chaetonotidae	Heterolepidoderma kolickae DB39	OQ354331
Chaetonotidae	Heterolepidoderma macrops KCH62	OQ354333
Chaetonotidae	Heterolepidoderma macrops TK127	JN185548
Chaetonotidae	Heterolepidoderma ocellatum TK167	JN185554
Chaetonotidae	Heterolepidoderma ocellatum TK168	JN185555
Chaetonotidae	Heterolepidoderma sp TK164	JQ798704
Chaetonotidae	Heterolepidoderma sp TK179	JN185563
Chaetonotidae	Heterolepidoderma striatum DB12	OQ354332
Chaetonotidae	Ichthydium skandicum TK182	JQ798705
Chaetonotidae	Ichthydium skandicum TK96	JQ798735
Chaetonotidae	Ichthydium skandicum TR839	MN493708
Chaetonotidae	Ichthydium skandicum TR93	MN493709
Chaetonotidae	Ichthydium sp GA52	MN493687
Chaetonotidae	Ichthydium squamigerum TK98	JQ798736
Chaetonotidae	Lepidochaetus brasilense TK223	JN185568
Chaetonotidae	Lepidochaetus tirjakovae VR1	MW824657
Chaetonotidae	Lepidochaetus tirjakovae VR4	MW824658
Chaetonotidae	Lepidochaetus tirjakovae VR9	MW824659
Chaetonotidae	Lepidochaetus zelinkai TK180	JN185564
Chaetonotidae	Lepidochaetus zelinkai TK181	JN185565
Chaetonotidae	Lepidochaetus zelinkai TK227	JN185570
Chaetonotidae	Lepidochaetus zelinkai TK94	JN185574
Chaetonotidae	Lepidodermella broa PIC677	OP596264
Chaetonotidae	Lepidodermella cf polaris HA2215	MN493695
Chaetonotidae	Lepidodermella intermedia TK126	JN185547
Chaetonotidae	Lepidodermella polaris AMU23416	MF374702
Chaetonotidae	Lepidodermella polaris HA24114	MN493696
Chaetonotidae	Lepidodermella polaris HA712	MN493697
Chaetonotidae	Lepidodermella squamata TK163	JN185551
Chaetonotidae	Lepidodermella squamata TK170	JN185557
Chaetonotidae	Lepidodermella squamata TK171	JN185558
Chaetonotidae	Lepidodermella squamata TK173	JN185560
Chaetonotidae	Litigonotus ghinii HET1	PP105008
Chaetonotidae	Polymerurus nodicaudus MT69	JN185542
Chaetonotidae	Polymerurus nodicaudus TK119	JQ798689
Chaetonotidae	Polymerurus nodicaudus TK165	JN185552
Chaetonotidae	Polymerurus nodicaudus TK78	JN185573
Chaetonotidae	Polymerurus rhomboides TK123	JN185546
Chaetonotidae	Polymerurus rhomboides TK217	JN185567
Dasydytidae	Dasydytes carvalhoae TK155	JQ798702
Dasydytidae	Dasydytes elongatus TK153	JQ798700
Dasydytidae	Dasydytes elongatus TK218	JQ798719
Dasydytidae	Dasydytes papaveroi TK157	JQ798703
Dasydytidae	Ornamentula paraensis TK147	JQ798697
Dasydytidae	Stylochaeta fusiformis TK156	JN185550
Neogosseidae	Kijanebalola devestiva TK240	KR822120
Xenotrichulidae	Draculiciteria tesselata MT63	JN185541
Xenotrichulidae	Draculiciteria tesselata TK142	JN185549
Xenotrichulidae	Xenotrichula sp. 1 TK-2012	JN185545
