# Supplementary material for: Rediscovery and neotype designation of Dichaetura surreyi Martin, 1990 (Gastrotricha: Paucitubulatina) from Northern Germany with a threefold morphological examination with a specimen-saving method
Source: Research Square preprint supplement (doi:10.21203/rs.3.rs-7189628/v1), 2025-08-08
Supplement: Supplementary file 2 [file fdd43cc133917adc5dded2b1.xlsx]

## Sheet: RawMeasurements
Feature	ind01	ind02	ind03	ind04	ind05	Range	Average
Body length	211.67	178.65	167.669	193.787	178.257	168–212 μm	186.007
Maximum head width	29.18	28.69	-	24.112	-	29–29 μm	27.3273
Maximum neck width	26.81	25.52	-	22.461	-	26–27 μm	24.9303
Maximum trunk width	36	25.055	-	18.702	-	25–36 μm	26.5857
Mouth Diameter	8.991	7.09	9.689	6.486	5.6	7–10 μm	7.5712
Hypostomium width	9.623	8.28	-	9.14	-	8–10 μm	9.01433
Hypostomium length	3.47	3.939	2.7	3.299	3.887	3–4 μm	3.459
Cephalion length	11.7	17.617	16.803	19.169	18.394	12–18 μm	16.7366
Cephalion width	19.851	-	-	13.156	-	20–20 μm	16.5035
Head dorsal sensory bristles length	-	9.93	16.48	16.916	14.54	10–16 μm	14.4665
Pharynx length	49.766	41.645	36.486	41.485	42.634	36–50 μm	42.4032
Anterior pharynx thickening (a) Width	12.77	9.288	10.19	11.092	11.061	9–13 μm	10.8802
Pharynx at its middle length (m) Width	14.52	11.78	12.065	12.35	12.548	12–15 μm	12.6526
Posterior pharynx thickening (p) Width	18.47	13.685	14.506	15.327	14.54	14–18 μm	15.3056
intestine junction width	12.79	7.9	7.206	6.512	9.936	7–13 μm	8.8688
Intestine length	118.928	106.166	89.424	115.954	109.114	89–119 μm	107.917
Furca length	25.868	23.101	26.209	29.029	26.23	23–26 μm	26.0874
adhesive tube Length	17.286	15.026	13.49	16.32	10.844	13–17 μm	14.5932
adhesive tube Width	2.275	1.923	1.374	2.33	2.25	1–2 μm	2.0304
Number of dorsal longitudinal scales columns (head)	19	16	-	12	-	16–19
Number of dorsal scales on each column	70	54	50	50	55	50–70
Number of ventral longitudinal scales columns (interciliary field)	8	8	-	8	-	8–8
Number of ventral scales on each column (interciliary field)	60	50	57	55	52	50–60
Length of dorsal posterior patch spines	15	11.83	12.26	20.099	18.432	12–15 μm	15.5242
Number of longitudinal columns of spines dorsal posterior spines patch	7	7	-	5	5	7–7
Number of transversal columns of spines on dorsal posterior patch	7	6	7	6	6	6–7
